# Supplementary material
Source: MDPI journal article supplement (https://www.mdpi.com/2624-5175/3/4/45)
Supplement: s1 [file s1]

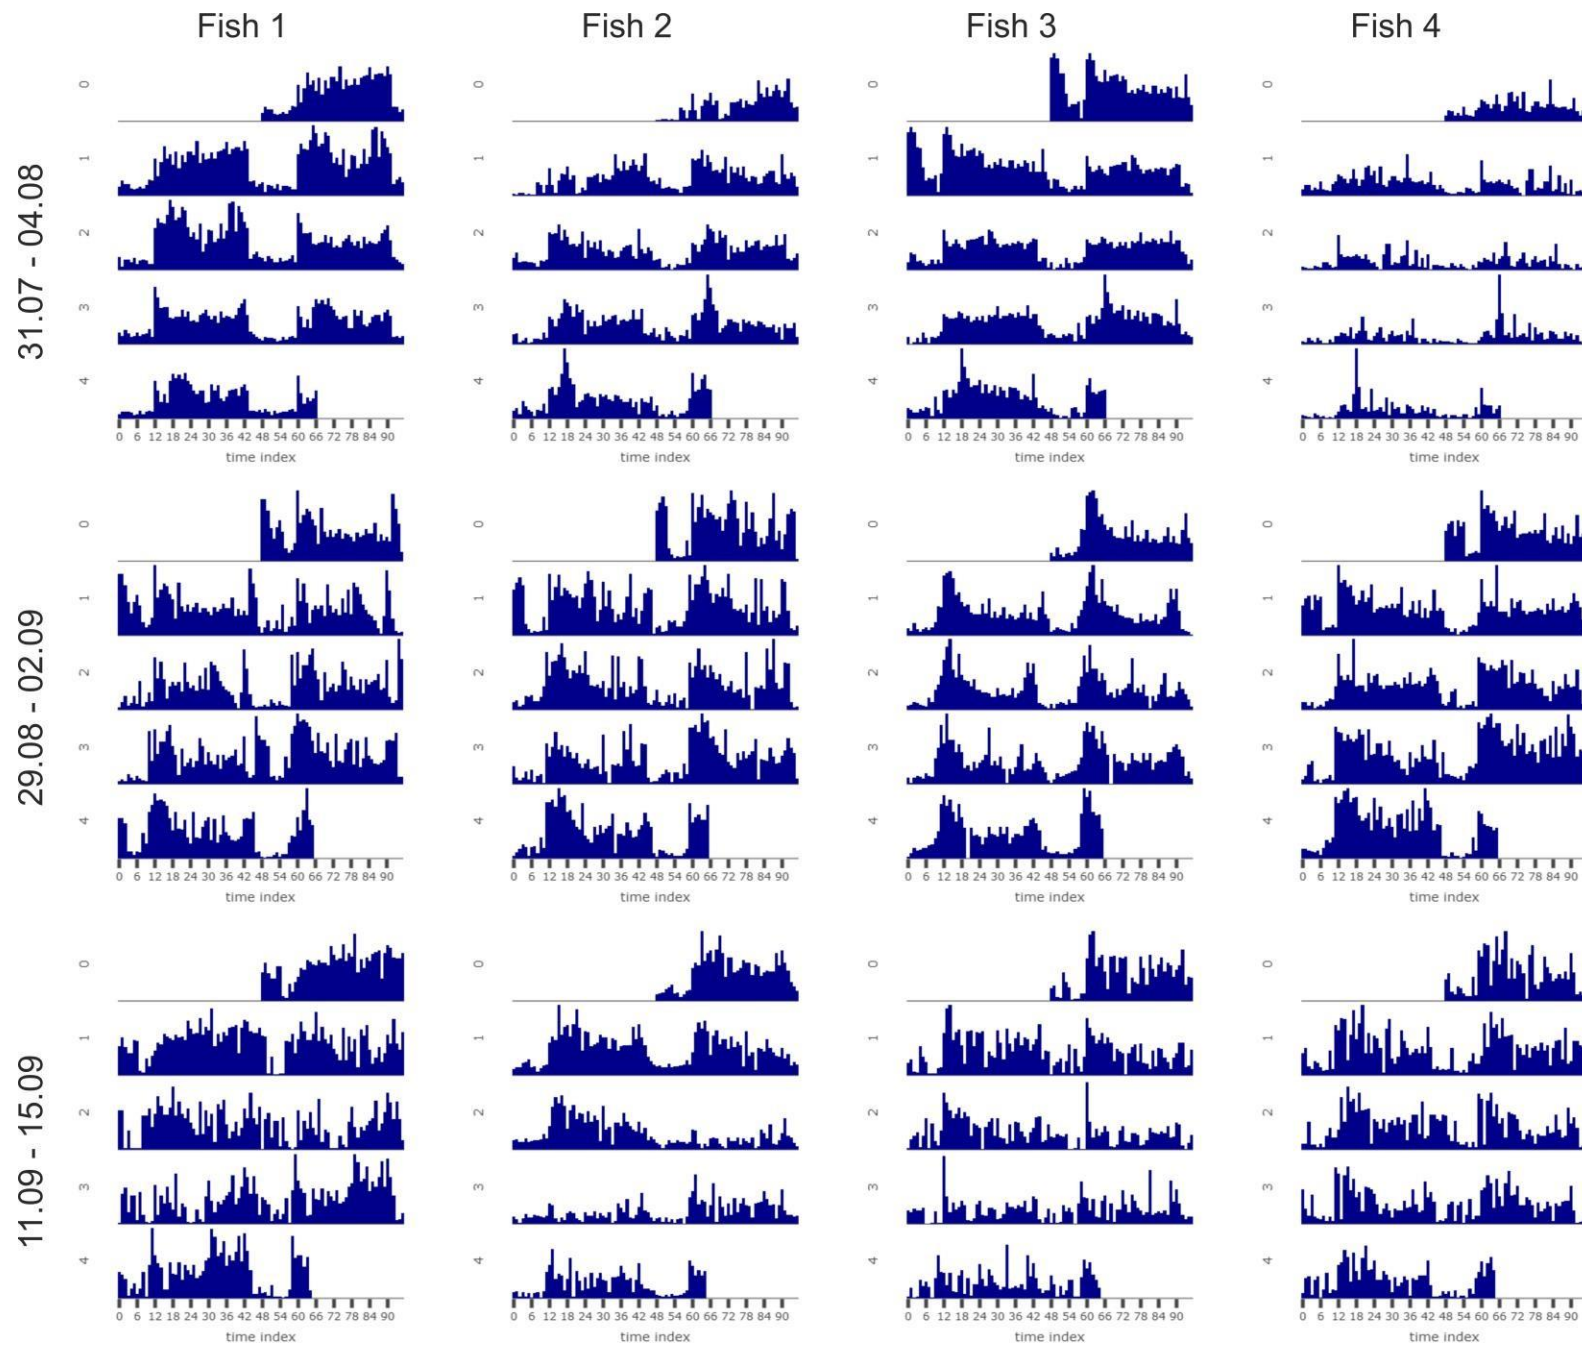

**Supplementary Figure S1.** Unsmoothed double plotted actograms of each zebrafish locomotor activity (swimming speed).
